# Supplementary material
Source: PubMed Central journal article supplement (PMC4833436)
Supplement: mmc4.pdf [file mmc4.pdf]

# Biallelic Mutations in *PDE10A* Lead to Loss of Striatal *PDE10A* and a Hyperkinetic Movement Disorder with Onset in Infancy

Christine P. Diggle,<sup>1,25</sup> Stacey J. Sukoff Rizzo,<sup>2,25</sup> Michael Popiolek,<sup>2,25</sup> Reetta Hinttala,<sup>3,4,5,6,7,25</sup> Jan-Philip Schülke,<sup>2,25,27</sup> Manju A. Kurian,<sup>8,9</sup> Ian M. Carr,<sup>1</sup> Alexander F. Markham,<sup>1</sup> David T. Bonthron,<sup>1</sup> Christopher Watson,<sup>1</sup> Saghira Malik Sharif,<sup>1</sup> Veronica Reinhart,<sup>2</sup> Larry C. James,<sup>2</sup> Michelle A. Vanase-Frawley,<sup>10</sup> Erik Charych,<sup>2</sup> Melanie Allen,<sup>10</sup> John Harms,<sup>2</sup> Christopher J. Schmidt,<sup>2</sup> Joanne Ng,<sup>8,11</sup> Karen Pysden,<sup>12</sup> Christine Strick,<sup>2</sup> Päivi Vieira,<sup>3,4</sup> Katariina Mankinen,<sup>13</sup> Hannaleena Kokkonen,<sup>14,15</sup> Matti Kallioinen,<sup>16</sup> Raija Sormunen,<sup>7,16</sup> Juha O. Rinne,<sup>17,18</sup> Jarkko Johansson,<sup>18</sup> Kati Alakurtti,<sup>18,19</sup> Laura Huilaja,<sup>3,20</sup> Tiina Hurskainen,<sup>3,20</sup> Kaisa Tasanen,<sup>3,20</sup> Eija Anttila,<sup>3,4</sup> Tiago Reis Marques,<sup>21</sup> Oliver Howes,<sup>21,22</sup> Marius Politis,<sup>23</sup> Somayyeh Fahiminiya,<sup>5,24</sup> Khanh Q. Nguyen,<sup>6</sup> Jacek Majewski,<sup>5,24</sup> Johanna Uusimaa,<sup>3,4,7,26,\*</sup> Eamonn Sheridan,<sup>1,26,\*</sup> and Nicholas J. Brandon<sup>2,26,27,\*</sup>

Deficits in the basal ganglia pathways modulating cortical motor activity underlie both Parkinson disease (PD) and Huntington disease (HD). Phosphodiesterase 10A (*PDE10A*) is enriched in the striatum, and animal data suggest that it is a key regulator of this circuitry. Here, we report on germline *PDE10A* mutations in eight individuals from two families affected by a hyperkinetic movement disorder due to homozygous mutations c.320A>G (p.Tyr107Cys) and c.346G>C (p.Ala116Pro). Both mutations lead to a reduction in *PDE10A* levels in recombinant cellular systems, and critically, positron-emission-tomography (PET) studies with a specific *PDE10A* ligand confirmed that the p.Tyr107Cys variant also reduced striatal *PDE10A* levels in one of the affected individuals. A knock-in mouse model carrying the homologous p.Tyr97Cys variant had decreased striatal *PDE10A* and also displayed motor abnormalities. Striatal preparations from this animal had an impaired capacity to degrade cyclic adenosine monophosphate (cAMP) and a blunted pharmacological response to *PDE10A* inhibitors. These observations highlight the critical role of *PDE10A* in motor control across species.

## Introduction

Cyclic adenosine monophosphate (cAMP) and cyclic guanosine monophosphate (cGMP) are essential second messengers regulating multiple signaling pathways in virtually all cell types.<sup>1</sup> Intracellular levels are finely regulated by cyclic nucleotide phosphodiesterases (PDEs), which degrade cAMP and cGMP by hydrolysis of both cAMP and cGMP to the corresponding nucleoside 5' monophosphate.<sup>2</sup> *PDE10A* (MIM: 610652) encodes phosphodies-

terase 10A, a dual cAMP-cGMP phosphodiesterase enriched in the medium spiny neurons (MSNs) of the corpus striatum.<sup>3</sup> The underlying pathology of the classic movement disorders Parkinson disease (PD [MIM: 168600]) and Huntington disease (HD [MIM: 143100]) focuses on a loss of dopamine-producing cells in the substantia nigra in PD and striatal MSNs in HD.<sup>4,5</sup> This results in dysregulated cortical striatal-thalamic connections, contributing to both motor and cognitive symptoms.<sup>6,7</sup> *PDE10A* modulates G-protein-coupled signaling, including that due to

<sup>1</sup>School of Medicine, University of Leeds, Leeds LS9 7TF, UK; <sup>2</sup>Neuroscience Research Unit, Pfizer Research and Development, Cambridge, MA 02139, USA; <sup>3</sup>PEDEGO Research Unit and Medical Research Center Oulu, University of Oulu and Oulu University Hospital, PO Box 5000, 90014 Oulu, Finland; <sup>4</sup>Department of Children and Adolescents, Oulu University Hospital, PO Box 23, 90029 Oulu, Finland; <sup>5</sup>Department of Human Genetics, McGill University, Montreal, QC H3A 1B1, Canada; <sup>6</sup>Montreal Neurological Institute, McGill University, Montreal, QC H3A 2B4, Canada; <sup>7</sup>Biocenter Oulu, University of Oulu, PO Box 5000, 90014 Oulu, Finland; <sup>8</sup>Developmental Neurosciences Programme, UCL Institute of Child Health, London WC1N 1EH, UK; <sup>9</sup>Department of Neurology, Great Ormond Street Hospital, London WC1N 1EH, UK; <sup>10</sup>Pfizer Research and Development, Groton, CT 06340, USA; <sup>11</sup>Institute of Women's Health, University College London, London WC1N 1EH, UK; <sup>12</sup>Department of Pediatric Neurology, Leeds General Infirmary, Great George Street, Leeds LS1 3EX, UK; <sup>13</sup>Länsi-Pohja Central Hospital, 94100 Kemi, Finland; <sup>14</sup>Department of Clinical Chemistry, University of Oulu, PO Box 5000, 90014, Oulu Finland; <sup>15</sup>Northern Finland Laboratory Centre, Oulu University Hospital, PO Box 500, 90029 Oulu, Finland; <sup>16</sup>Department of Pathology, Oulu University Hospital and University of Oulu, PO Box 5000, 90014 Oulu, Finland; <sup>17</sup>Division of Clinical Neurosciences, Turku University Hospital and University of Turku, PO Box 52, 20521 Turku, Finland; <sup>18</sup>Turku PET Centre, Turku University Hospital and University of Turku, PO Box 52, 20521 Turku, Finland; <sup>19</sup>Department of Diagnostic Radiology, University of Turku and Turku University Hospital, PO Box 52, 20521 Turku, Finland; <sup>20</sup>Department of Dermatology and Oulu Center for Cell-Matrix Research, Oulu University Hospital and University of Oulu, PO Box 5000, 90014 Oulu, Finland; <sup>21</sup>Department of Psychosis Studies, Institute of Psychiatry, Psychology, and Neuroscience, King's College London, London SE5 8AF, UK; <sup>22</sup>MRC Clinical Sciences Centre, Imperial College London, Hammersmith Hospital Campus, London W12 0NN, UK; <sup>23</sup>Neurodegeneration Imaging Group, Institute of Psychiatry, Psychology, and Neuroscience, King's College London, London SE5 8AF, UK; <sup>24</sup>McGill University and Génome Québec Innovation Centre, Montreal, Quebec, QC H3A 0G1, Canada

<sup>25</sup>These authors contributed equally to this manuscript

<sup>26</sup>These authors contributed equally to this manuscript

<sup>27</sup>Present address: Innovative Medicines and Early Development Biotech Unit, AstraZeneca Neuroscience, 141 Portland Street, Cambridge, MA 02139, USA

\*Correspondence: johanna.uusimaa@oulu.fi (J.U.), e.sheridan@leeds.ac.uk (E.S.), nick.brandson@azneuro.com (N.J.B.)

<http://dx.doi.org/10.1016/j.ajhg.2016.03.015>

©2016 by The American Society of Human Genetics. All rights reserved.



from caffeine, tobacco, and alcohol for at least 12 hr before scanning. Healthy control individuals were recruited as part of an ongoing study.<sup>11</sup> Subjects were positioned supine, and head position was maintained as previously described.<sup>11</sup> All participants were scanned on a Siemens Biograph HI-REZ 6 PET-CT scanner after the injection of an intravenous bolus of ~250 MBq [<sup>11</sup>C] IMA107. Dynamic emission data were acquired continuously for 90 min after the injection of [<sup>11</sup>C] IMA107. The dynamic images were reconstructed into 26 frames (8 × 15 s, 3 × 60 s, 5 × 120 s, 5 × 300 s, and 5 × 600 s) with in-house software and a filtered back-projection algorithm (direct inverse Fourier transform) with a 128 × 128 matrix and 2.6× zoom, producing images with isotropic voxel size of 2 × 2 × 2 mm<sup>3</sup> and a transaxial Gaussian filter of 5 mm.

MRI scans were acquired with a 32-channel head coil on a Siemens MAGNETOM Verio 3T MRI scanner and included (1) a T1-weighted magnetization-prepared rapid gradient-echo (MPRAGE) sequence (time repetition [TR] = 2,300 ms, time echo [TE] = 2.98 ms, flip angle = 9°, time to inversion [TI] = 900 ms, and matrix = 240 × 256) for co-registration with the PET images and (2) fast GM T1 inversion recovery (FGATIR; TR = 3,000 ms, TE = 2.96 ms, flip angle = 8°, TI = 409 ms, and matrix = 240 × 256) and fluid and WM suppression (FLAWS; TR = 5,000 ms, TE = 2.94 ms, flip angle = 5°, TI = 409/1,100 ms, and matrix = 240 × 256) sequences for improving delineation of subcortical brain regions. All sequences used a 1 mm<sup>3</sup> voxel size, anteroposterior phase-encoding direction, and symmetric echo.

#### Processing of [<sup>11</sup>C] IMA107 PET Data

Data analysis was performed with the MIAKAT software package (v.3.3.8, Imanova). Image processing and kinetic modeling of [<sup>11</sup>C] IMA107 PET data were blind to subject groups and performed with a standard template of regions of interest (see Niccolini et al.<sup>12</sup> for a full description). The primary outcome measure was the non-displaceable binding potential (BP<sub>ND</sub>) of [<sup>11</sup>C] IMA107 in the striatum, which is proportional to the ratio of the B<sub>max</sub> for PDE10A to the dissociation constant of [<sup>11</sup>C] IMA107 for PDE10A.

## Genetic Analysis

In view of the consanguinity in both families, genetic analysis was performed under a recessive model. In family 1, we performed a genome-wide homozygosity scan by using the Affymetrix Human SNP Array 6.0 on DNA from four affected and two unaffected individuals. Genotype data were analyzed with AutoSNPa and IBDfinder software.<sup>13,14</sup>

Two affected individuals from family 2 were investigated by chromosomal microarray on DNA extracted from fibroblasts with a 50-mer oligochip (HumanCytoSNP-12 v.2.1 BeadChip, Illumina). Analysis was performed with both GenomeStudio (hg19) and KaryoStudio (hg18) programs (Illumina).

## WES

### Analyses for Family 1

**Alignment and Variant Calling.** Target capture was performed with the Agilent SureSelect Human All Exon v.4 exome enrichment kit according to the manufacturer's standard protocol. Sequencing of 150-bp paired-end reads was performed with an Illumina MiSeq. Reads were aligned to GRCh37 with Novoalign (Novocraft Technologies) and processed with the Genome Analysis Toolkit (GATK) and Picard (see [Web Resources](#)) for realignment of short indels and removal of duplicate reads. Depth of coverage of the

consensus coding sequence (CCDS) was assessed with GATK, which showed that >94% of CCDS bases were covered by at least five good-quality reads (minimum Phred-like base quality of 17 and minimum mapping quality of 20). Single-nucleotide variants (SNVs) and indels were called with the GATK UnifiedGenotyper feature.<sup>15,16</sup>

**Filtering.** Custom Perl scripts were used for removing variants present in dbSNP132 or with a minor allele frequency ≥ 0.1% and for annotating functional consequences. We called variants in the autozygous region only with a minimum Phred-like genotype quality of 30 and selected for indels within coding regions, non-synonymous SNVs, and splice-site variants. Variants present in the 1000 Genomes dataset (November 2011), the National Heart, Lung, and Blood Institute (NHLBI) Exome Sequencing Project (ESP) Exome Variant Server, and another 2,500 ethnically matched in-house exomes were also removed.

### Analyses for Family 2

Target capture was performed with the Agilent SureSelect Human All Exon v.4.1 according to the manufacturer's standard protocol. Sequencing was performed on the Illumina GAIIX instrument, generating 100 bp paired-end reads. In brief, the Burrows-Wheeler Aligner (v.0.5.9) was used to align raw reads against the reference human genome (NCBI Genome build GRCh37).<sup>17</sup> Local realignment around indels and coverage assessment were performed with GATK,<sup>16</sup> and removal of duplicate reads was performed with Picard Tools (v.1.53). A mean coverage of 127× was obtained for all CCDS exons. The positions of variants on the genome were detected by SAMtools (v.0.1.17).<sup>18</sup> Only variants covered with at least five reads and a quality score higher than 20 were considered. Subsequently, ANNOVAR was used for assigning annotations to the list of detected variants.<sup>19</sup> To determine potential candidate variants, we focused on likely protein-damaging variants (frameshift, indel, nonsense, missense, and canonical splice-site variants) and discarded any variants with an allele frequency > 1% in the ExAC Browser or our in-house exome database (~1,000 exomes). We also removed all variants seen as homozygous in the ExAC Browser.

## HEK293 Cell Transfection Experiments

HEK293 cells were transfected with human *PDE10A* (WT, c.320A>G, or c.346G>C) in the pcDNA3.1 vector with the use of Lipofectamine 2000 (Life Technologies 11668-019) according to the manufacturer's instructions. Samples for protein analysis were harvested after 24 hr. For every million cells plated on a 10 cm dish, 2 μg of plasmid and 30 μl of Lipofectamine 2000 were used. Lysates were analyzed by immunoblot as described below.

## Construction of a PDE10A p.Tyr97Cys Targeting Vector and Targeted Murine Embryonic Stem Cells

We constructed a murine *Pde10a* (MGI: 1345143) targeting vector to create the p.Tyr97Cys variant, which is homologous to the human p.Tyr107Cys variant. Red/ET recombineering technology<sup>20</sup> was used to target a *loxP*-flanked neomycin cassette into intron 4 of the *Pde10a* locus along with the TAT:TGT codon mutation in exon 4 of a murine bacterial artificial clone (BAC) (RP23-67C3, Invitrogen). Again via Red/ET recombineering, we cloned approximately 11 kb of the *Pde10a* locus, including the newly introduced neomycin cassette along with the p.Tyr97Cys genetic modification, from the BAC into a pUC57 plasmid to generate the final sequence-confirmed targeting vector. 5' and 3' homology arms were 5.4 and 5.5 kb, respectively (Figure S4).

The linearized PDE10A p.Tyr97Cys targeting vector was electroporated into murine Bruce4 embryonic stem (ES) cells (from Colin Stewart, National Cancer Institute), which were grown according to standard procedures previously described.<sup>21</sup> After G418 selection, correctly targeted homologous recombinant ES cell clones were identified by Southern blot analysis. A probe outside of the 5' homology arm was used in conjunction with MscI-digested ES cell genomic DNA. With this strategy, the endogenous WT allele yielded a band of ~11 kb, whereas the targeted allele revealed a predicted RFLP of ~8 kb as a result of the introduction of a novel MscI site from the PDE10A p.Tyr97Cys targeting vector. To ensure that correct homologous recombination occurred at the 3' end, we confirmed targeting by Southern with BamHI-digested ES cell genomic DNA in combination with a probe external to the 3' homology arm.

### Generating KI Mice Carrying PDE10A p.Tyr97Cys

Targeted ES cells carrying the PDE10A p.Tyr97Cys variant with a normal 40XY karyotype (Coriell Institute for Medical Research) were microinjected into BALB/c blastocyst-stage embryos (Charles River Laboratories) according to standard procedures previously described.<sup>22</sup> Resulting chimeric males were mated to EIIa-Cre transgenic females for the generation of offspring heterozygous for PDE10A p.Tyr97Cys in the germline and free of the neomycin selection cassette. Offspring from these and all subsequent matings were genotyped by qPCR analysis at Transnetyx; offspring with homozygous KI of PDE10A p.Tyr97Cys along with WT controls were then generated from heterozygous mating pairs. The Pfizer Institutional Animal Care and Use Committee reviewed and approved the animal use in these studies. The animal care and use program is fully accredited by the Association for Assessment and Accreditation of Laboratory Animal Care International.

### Behavioral Phenotyping of KI Mice Carrying p.Tyr97Cys

Upon arrival at the animal facility, separate cohorts of young (4–5 weeks) and adult (7–10 weeks) WT/WT (WT), WT/KI (HET), and KI/KI (KI) male mice ( $n = 7–13$  per genotype) were individually housed in standard ventilated caging on a 12/12 hr light/dark cycle (lights on at 6:00 a.m.) and were provided with food and water ad libitum. Mice were acclimatized for a minimum of 5 days prior to testing. Mice were subjected to a battery of behavioral tests during the light cycle with a minimum 2 day inter-test interval (ITI). Mice from the young cohort were maintained in the facility at the conclusion of initial phenotyping until they reached 24–25 weeks of age, at which time they were re-evaluated as aged mice. The phenotyping battery consisted of the SHIRPA protocol<sup>23</sup> and then the following tests in order.

#### Rotarod

Balance and coordination were evaluated in test mice with an automated accelerating rotarod (Rotamex; Columbus Instruments). The rotarod consisted of four lanes separated by a visual barrier with a rotating spindle (3.0 cm diameter) elevated 44.5 cm from the floor. Infrared beams placed at the level of the spindle detected the presence or absence of the animal on the spindle. Mice were placed on the rotarod at 4 RPM, which was accelerated at a rate of 1 RPM per 8 s throughout a 5 min trial period. Mice were subjected to five consecutive trials separated by a  $30 \pm 5$  min ITI. Trials ended at the conclusion of the 5 min trial period or when the mouse fell from the rod. Latency to fall (s) was recorded and analyzed by a two-way repeated-measures

ANOVA (genotype  $\times$  trial) with GraphPad Prism v.5.0 and Bonferroni post hoc tests as appropriate.

#### Open-Field Activity

VersaMax chambers for monitoring animal activity (AccuScan Instruments) were used for assessing alterations in general exploratory behavior. Chambers were housed in a testing room with environmental conditions similar to those of the housing room (~400 lux and 60–70 dB background noise). Mice were habituated to the testing room for a minimum 60 min habituation period prior to testing. After habituation, mice were placed into individual open-field chambers, and behavior was recorded in the open field (40  $\times$  40  $\times$  40 cm) for a 60 min period. Infrared beams captured total distance traveled (cm) and rearing behavior (vertical activity measured by beam breaks). Data were analyzed by two-way repeated-measures ANOVA (genotype  $\times$  time) with GraphPad Prism v.5.0 and Bonferroni post hoc tests as appropriate.

#### Dynamic Weight Bearing

The dynamic weight-bearing (DWB) test is a type of incapacitance test used to measure postural equilibrium in freely moving rodents (BioSeb). The apparatus consists of a Plexiglas enclosure (22  $\times$  22  $\times$  30 cm) with a floor instrument cage and video-camera interface that can independently measure the weight borne by each limb of the freely moving subject. Mice were placed individually in the apparatus for a 3–5 min period (no acclimation period). A trained observer blind to genotype mapped left and right hind-paws and forepaws according to the video. Raw paw-pressure values interfaced with video data were analyzed by DWB software. Data for individual measures were analyzed by one-way ANOVA with Dunnett's post hoc test as appropriate.

### Immunoblotting

Mouse striatal tissue or HEK293 cells were lysed in RIPA buffer (50 mM Tris-HCl [pH 8.0], 150 mM NaCl, 1.0% NP-40, 0.5% sodium deoxycholate, and 0.1% SDS supplemented with protease and phosphatase inhibitor cocktails) and homogenized by brief sonication. Equal amounts of protein were separated in a reducing 4%–12% Tris-Glycine gel (Invitrogen) and blotted onto a nitrocellulose membrane (Hybond-ECL, GE). Protein levels were determined by fluorescent or ECL-based immunoblotting followed by densitometric analysis (Li-Cor-Odyssey, ImageJ). The following antibodies were used: mouse-anti-PDE10A-24F3.F11,<sup>24</sup> rabbit-anti-PDE10A-426v2,<sup>25</sup> mouse-anti-GAPDH-MAB374 (Millipore), goat-anti-Rabbit-IRDye680 (Li-Cor), goat-anti-Mouse-IRDye800 (Li-Cor), and donkey-anti-Mouse-HRP (Jackson). Data were analyzed by one-way ANOVA with GraphPad Prism v.5.0.

## Results

### Clinical Characterization of Families

Family 1 is a consanguineous UK family of Pakistani origin (Figure 1A, left). All affected individuals presented in childhood (mean age of 3 months) with axial hypotonia and a generalized hyperkinetic movement disorder. This was characterized by dyskinesia of the limbs and trunk. At times, the hyperkinetic movements had a jerky quality, and intermittent chorea and ballismus were also present. Facial involvement was evident with orolingual dyskinesia, drooling, and dysarthria. The severity of the hyperkinesia varies considerably within the family, and the oldest individual is the least affected. Cognitive performance

is preserved, and all affected individuals graduated from high school.

Family 2 is from northern Finland (Figure 1A, right). Two affected boys were born to healthy first-cousin parents. Both boys show mild cognitive delay and severe axial hypotonia. From early infancy, they presented with a generalized hyperkinetic movement disorder characterized by dyskinesia affecting all four limbs and the trunk and face (Movies S1 and S2). Expressive language was not evident until 7 years of age, and both individuals have persistent dysarthria.

IV:2 is more severely affected; he has had focal epilepsy since 3.5 years of age and feeds via a gastrostomy tube. Further clinical details can be found in Table S1.

In both families, array comparative genomic hybridization, muscle biopsy, and, crucially, brain MRIs in individuals IV:2, V:2, and V:3 from family 1 and both of the affected individuals from family 2 were normal. Further details are provided in the Supplemental Note.

### Genetic Analyses Reveal Missense Mutations in *PDE10A*

In family 1, genome-wide SNP analysis revealed a single 2.6 Mb region of concordant homozygosity on 6q26. WES revealed one potentially pathogenic variant within the homozygous region: c.320A>G (p.Tyr107Cys) in exon 4 of *PDE10A* (GenBank: NM\_001130690.2) (Figure 1B). In family 2, there were 16 common autozygous regions, the three largest of which clustered on 6q26. WES revealed a single potentially deleterious mutation within the homozygous segments: c.346G>C (p.Ala116Pro), also in exon 4 of *PDE10A* (Figure 1B). Neither variant was present in dbSNP, 1000 Genomes, the NHLBI ESP, or our in-house exome databases. Both individual variants are fully conserved back to *Danio rerio* (Figure 1B), lie within a region of very high conservation, and are predicted to be deleterious.<sup>26</sup> Sanger sequencing confirmed the presence of the variants and that they segregate with the phenotype in the families.

### *PDE10A* Levels Are Decreased in an Individual with the p.Tyr107Cys Variant

Given that there are now well-characterized PET ligands for *PDE10A*, we wanted to understand the impact of the mutations on *PDE10A* levels in the human brain. Because of ethical considerations, we were able to study only individual IV:2 from family 1 in this manner. *PDE10A* PET signal was robustly lower in this individual than in healthy control individuals (Figure 1C), and quantitative analysis revealed a 70% reduction in *PDE10A* in all basal ganglia regions (Figure 1C and Figure S1). An accompanying structural MRI showed that this loss of *PDE10A* signal was not due to loss of striatal volume (see Figure S2).

### Effect of *PDE10A* Mutations on *PDE10A* Levels in HEK293 Cells

To evaluate the functional consequence of the *PDE10A* mutations, we expressed WT and mutant *PDE10A* (c.320A>G

and c.346G>C) in HEK293 cells. *PDE10A* levels were investigated by immunoblotting using validated antibodies (see Figure S3). A significant decrease in *PDE10A* levels was associated with both mutations (Figure 1D), consistent with the human PET study above. The reduction of *PDE10A* p.Ala116Pro was greater than that of *PDE10A* p.Tyr107Cys, perhaps reflecting the more severe phenotype seen in the Finnish family.

### A Mouse Model Carrying *PDE10A* p.Tyr97Cys, Homologous to Human *PDE10A* p.Tyr107Cys, Displays Deficits in Motor Control

We next investigated KI mice carrying the *PDE10A* variant p.Tyr97Cys, which is homologous to the human p.Tyr107Cys variant (Figure S4). SHIRPA phenotyping of the HET and KI mice did not reveal any behavioral phenotypes.<sup>23</sup> We therefore investigated locomotor activity in young (4–5 weeks of age), adult (7–10 weeks of age), and old animals (24–25 weeks of age). Data for adult mice are shown in Figures 2A–2C, and data for young and old mice are presented in Figure S5.

KI mice showed significantly less total distance traveled (Figure 2A and Figure S5, left) and rearing behavior (Figure 2B and Figure S5, middle) than did age-matched HET and WT controls. Relative to age-matched HET and WT controls, KI mice also demonstrated a reduced ability to maintain their balance on an accelerating rotarod (Figure 2C and Figure S5, right). In a DWB assay, relative to both HET and WT littermate controls, KI mice demonstrated statistically significant increases in forepaw bearing weight, whereas hindpaw weights were reduced (Figure S6). Together, these data show that KI mice display motor abnormalities.

### p.Tyr97Cys KI Mice Have Reduced Levels of *PDE10A* in the Striatum

Consistent with the PET data on human *PDE10A* and the protein studies in HEK293 cells, KI mice showed lower striatal protein levels than did age-matched WT ( $p < 0.001$ ) and HET animals ( $p < 0.001$ ; Figures 2D and 2E). Striatal tissue from KI mice showed lower levels of *PDE10A* activity than did that of age-matched WT ( $p < 0.001$ ) and HET animals ( $p < 0.01$ ; Figure 2F). Inhibition of *PDE10A* is known to lead to an increase in levels of phosphorylated CREB (pCREB). After administration of the potent, selective *PDE10A* inhibitor MP-10, WT and HET mice showed 400% more ( $p < 0.001$ ) striatal pCREB than did vehicle-treated mice. No such increase in pCREB was observed in the KI mice, confirming that the biallelic *PDE10A* variant reduces downstream pCREB signaling (Figure 2G).

### Discussion

We have described eight individuals from two families affected by an early-onset hyperkinetic movement disorder associated with mutations in *PDE10A*. Expression of

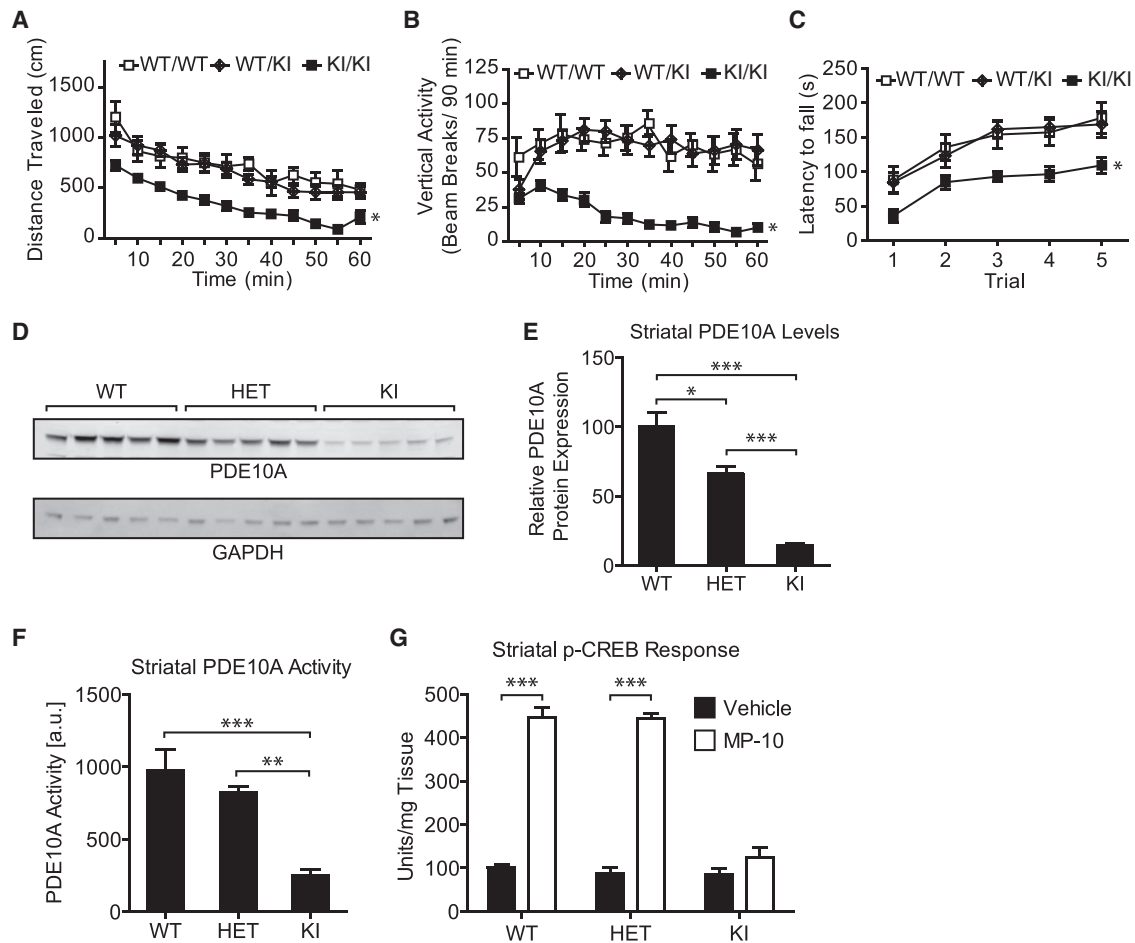

**Figure 2. Adult KI Mice with PDE10A p.Tyr97Cys Demonstrate Motor Abnormalities and Reduced Striatal PDE10A Levels and Function**

(A and B) Total distance traveled (A) and rearing behavior (B) as measured by vertical activity were recorded and analyzed by a two-way repeated-measures ANOVA (genotype  $\times$  trial) with GraphPad Prism v.5.0 and Bonferroni post hoc tests as appropriate. All data are presented as the group mean  $\pm$  SEM.  $n = 13, 12,$  and  $11$  for WT (WT/WT), HET (WT/KI), and KI (KI/KI) mice, respectively. All adult mice were 7–10 weeks old. \* $p < 0.05$ .

(C) Latency to fall (s) was recorded and analyzed by a two-way repeated-measures ANOVA (genotype  $\times$  trial) with GraphPad Prism v.5.0 and Bonferroni post hoc tests as appropriate. KI mice carrying the homologous p.Tyr97Cys variant showed a hypokinetic phenotype, deficits in rearing activity, and deficits in performance on the rotarod. \* $p < 0.05$ .

(D) The PDE10A p.Tyr97Cys variant led to a reduction in PDE10A. Representative immunoblots of striatal protein lysates from adult mice from each genotype ( $n = 5$  for WT, HET, and KI) were analyzed by immunoblotting for levels of PDE10A with a specific polyclonal PDE10A antibody (Rbg426v2). GAPDH was used as a loading control.

(E) Quantification of PDE10A levels in striatal lysates. Data are presented as the group mean  $\pm$  SEM. PDE10A levels were normalized to GAPDH levels. Normalized data were analyzed by one-way ANOVA with GraphPad Prism v.5.0. PDE10A levels were measured in the striatum from adult mice of all three genotypes ( $n = 5$  for WT, HET, and KI). Levels of PDE10A p.Tyr97Cys were lower than WT protein levels. \* $p < 0.05$ , \*\*\* $p < 0.001$ .

(F) The PDE10A p.Tyr97Cys variant led to a reduction in enzymatic activity. PDE10A enzyme activity was measured in striatal lysates from adult mice of all three genotypes ( $n = 5$  for WT, HET, and KI). Enzyme activity was measured by means of a scintillation proximity assay modified from an Amersham Biosciences protocol (TRKQ7090). The assay measures levels of  $5'$  AMP produced when cAMP is exposed to phosphodiesterase. Data are presented as the group mean  $\pm$  SEM and were analyzed by one-way ANOVA with GraphPad Prism v.5.0. KI mice showed a reduction in PDE10A activity. \*\* $p < 0.01$ , \*\*\* $p < 0.001$ .

(G) The PDE10A p.Tyr97Cys variant led to a reduction in downstream signaling. Downstream PDE10A signaling was measured indirectly by quantifying pCREB levels in striatum from adult mice of all three genotypes ( $n = 5$  for WT, HET, and KI), which had been dosed with either the selective PDE10A inhibitor MP-10 or vehicle. pCREB levels were higher in both WT and HET animals dosed with the PDE10A inhibitor than in vehicle-treated animals. Data are presented as the group mean  $\pm$  SEM and were analyzed by a paired  $t$  test with GraphPad Prism v.5.0. \*\*\* $p < 0.001$ .

the mutant variants of human PDE10A in HEK293 cells revealed lower levels of both mutant proteins than of the WT. Critically, these observations were reflected in one of the affected individuals, who had a significant loss of stri-

tal PDE10A signal when investigated with a specific PDE10A PET ligand in the absence of abnormalities on MRI. PDE10A levels in striatal tissue lysates from a KI model were also decreased, leading to a reduced ability to

degrade cyclic nucleotides. In KI mice, downstream signaling by PDE10A was decreased, demonstrated by an absent pCREB response after dosage with a PDE10A inhibitor.

PDE10A is specifically found at high levels in the striatal MSNs,<sup>3</sup> which receive input from the cortex and thalamus. MSNs can be divided into two cell types: “direct pathway” MSNs (dMSNs) express dopamine receptor D1 and project to the globus pallidus internal segment and substantia nigra pars reticulata, whereas “indirect pathway” MSNs (iMSNs) express dopamine receptor D2 and project indirectly to the same nuclei via the globus pallidus external segment and subthalamic nuclei. The classic model predicts that dMSN activation promotes movement, whereas iMSN activation leads to inhibition of movement.<sup>6</sup> PDE10A is expressed in both cell types, but pharmacological data indicate that it might regulate them differentially.<sup>27</sup> Pharmacological inhibition of PDE10A is consistent with the preferential activation of the indirect pathway,<sup>27</sup> which should result in hypokinetic symptoms. Both *Pde10a*-knock-out (KO) mice<sup>8</sup> and the *Pde10a*-KI mice described here are indeed hypokinetic. However, the affected individuals experience significant hyperkinetic motor symptoms. This is reminiscent of the phenotypes observed in mouse models of HD. Individuals affected by HD experience an initial hyperkinetic phase followed by a hypokinetic phase.<sup>28</sup> However, only some HD models have a hyperkinetic phase, and it is generally short;<sup>29</sup> the lack of recapitulation of motor symptoms between the KI animal and the affected individuals is thus not unprecedented.

Pharmacological inhibitors of PDE10A have been shown to reverse a number of phenotypes in HD mouse models.<sup>9</sup> However PDE10A levels are reduced in animal models of HD.<sup>30</sup> Furthermore, recent PET studies have shown that individuals with pathogenic *HTT* (MIM: 613004) expansions exhibit reduced levels of striatal PDE10A.<sup>31,32</sup> This correlates with disease severity, although significant decreases in PDE10A have also been seen in asymptomatic individuals carrying pathogenic expansions.<sup>31,32</sup> The phenotype described here results from loss of PDE10A activity in the striatum, differentiating the effects of selective PDE10A deficiency from those accompanying striatal cell loss. Our observations confirm that PDE10A plays a key role in regulating striato-cortical movement control. Genetic depletion of PDE10A appears to alter cyclic nucleotide signaling in the MSNs in humans and thus result in an activation of motor activity and a hyperkinetic movement disorder.

These data accord with the recent observation of activating mutations in adenylyl cyclase 5, *ADCY5* (MIM: 600293).<sup>33,34</sup> The encoded enzyme converts ATP to pyrophosphate and cAMP and is also found at high levels in the striatum. A hyperkinetic movement disorder was reported in affected individuals, whereas cellular modeling of the mutations confirmed an increase in cAMP levels. The variants we report result in a reduced capacity to degrade cAMP in a cellular model. This is recapitulated in

the animal model we report. These observations suggest that modulation of cyclic nucleotide levels in the striatum plays a key role in movement control.

Our observations, particularly the lack of pCREB response to PDE10A inhibition in our KI mouse model, suggest that the dose of PDE10A inhibitors might need to be modified in conditions characterized by reduced PDE10A levels. The Amaryllis study, a phase II clinical study of a PDE10A inhibitor, is presently underway in HD. The outcome of these trials will further inform the clinical relevance and impact of our observations.

In conclusion, we report a primary loss of PDE10A due to biallelic *PDE10A* mutations in humans; this results in striatal dysfunction, leading to a hyperkinetic movement disorder. The effects are independent of any other disease process, including evidence of cell loss. These observations confirm a key role for PDE10A in the physiology of movement control and a central role for modulation of striatal cyclic nucleotide levels in this process. They suggest cellular dysfunction rather than cell death as a cause of movement disorders.

### Supplemental Data

Supplemental Data include a Supplemental Note, six figures, one table, and two movies and can be found with this article online at <http://dx.doi.org/10.1016/j.ajhg.2016.03.015>.

### Conflicts of Interest

S.J.S.R., E.C., M.A., J.H., and C.S. were full-time paid employees of Pfizer Inc. at the inception of this work. M.P., V.R., and M.A.V.-F. are full-time paid employees at Pfizer Inc. L.C.J. and C.J.S. are employees and shareholders at Pfizer Inc. N.J.B. is a full-time employee and shareholder at AstraZeneca and was previously a full-time employee at Pfizer Inc. He does not hold Pfizer shares. J.-P.S. is an employee and shareholder of AstraZeneca.

### Acknowledgments

The authors are grateful to Ted Simon and Michael Roos for assistance with the generation of the transgenic knock-in mice and Edwin Berryman, Bonnie Deschenes, Tabitha Jones, Mona Sisodia, Ms. Pirjo Keränen, Ms. Anja Mattila, and Ms. Riitta Vuento for their expert assistance. This work was supported by the following: Wellbeing of Women (grant RG992), the University of Leeds Biomedical Health Research Centre (grant PSF42 to E.S.), the Academy of Finland Research Council for Health (decision numbers 138566 to J.U. and 266498 and 273790 to R.H.), the Sigrid Juselius Foundation (J.U. and R.H.), the Finland Foundation for Pediatric Research (J.U.), the Alma and K.A. Snellman Foundation (J.U.), the Emil Aaltonen Foundation (R.H.), the European Union's Seventh Framework Programme (Marie Curie International Outgoing Fellowship under grant 273669 [BioMit] to R.H.), and the Department of Pediatrics and Adolescence at Oulu University Hospital (Special State Grants for Health Research).

Received: January 28, 2016

Accepted: March 14, 2016

Published: April 7, 2016

## Web Resources

The URLs for the data presented herein are as follows:

1000 Genomes, <http://www.1000genomes.org/>  
ClinicalTrials.gov, the Amarellis Study, <https://clinicaltrials.gov/show/NCT02197130>  
ANNOVAR, <http://annovar.openbioinformatics.org/en/latest/>  
AutoSNPa, <http://dna.leeds.ac.uk/autosnpa/>  
Burrows-Wheeler Aligner, <http://bio-bwa.sourceforge.net/>  
dbSNP, <http://www.ncbi.nlm.nih.gov/projects/SNP/>  
Exome Aggregation Consortium (ExAC) Browser, <http://exac.broadinstitute.org/>  
Genome Analysis Toolkit (GATK), <https://www.broadinstitute.org/gatk/>  
IBDfinder, <http://dna.leeds.ac.uk/ibdfinder/>  
NCBI Genome build GRCh37, [ftp://ftp.ncbi.nlm.nih.gov/genomes/Homo\\_sapiens/ARCHIVE/ANNOTATION\\_RELEASE.105/](ftp://ftp.ncbi.nlm.nih.gov/genomes/Homo_sapiens/ARCHIVE/ANNOTATION_RELEASE.105/)  
NHLBI Exome Sequencing Project (ESP) Exome Variant Server, <http://evs.gs.washington.edu/EVS/>  
Novoalign, <http://www.novocraft.com/products/novoalign/>  
OMIM, <http://www.omim.org>  
Picard, <http://broadinstitute.github.io/picard/>  
RefSeq, <http://www.ncbi.nlm.nih.gov/refseq/>  
SAMtools, <http://www.htslib.org/>  
Transnetyx, <http://www.transnetyx.com/>

## References

1. Beavo, J.A., and Brunton, L.L. (2002). Cyclic nucleotide research – still expanding after half a century. *Nat. Rev. Mol. Cell Biol.* 3, 710–718.
2. Conti, M., and Beavo, J. (2007). Biochemistry and physiology of cyclic nucleotide phosphodiesterases: essential components in cyclic nucleotide signaling. *Annu. Rev. Biochem.* 76, 481–511.
3. Coskran, T.M., Morton, D., Menniti, F.S., Adamowicz, W.O., Kleiman, R.J., Ryan, A.M., Strick, C.A., Schmidt, C.J., and Stephenson, D.T. (2006). Immunohistochemical localization of phosphodiesterase 10A in multiple mammalian species. *J. Histochem. Cytochem.* 54, 1205–1213.
4. Jellinger, K.A. (2001). The pathology of Parkinson's disease. *Adv. Neurol.* 86, 55–72.
5. Walker, F.O. (2007). Huntington's disease. *Lancet* 369, 218–228.
6. DeLong, M.R., and Wichmann, T. (2007). Circuits and circuit disorders of the basal ganglia. *Arch. Neurol.* 64, 20–24.
7. Gratwicke, J., Jahanshahi, M., and Foltynie, T. (2015). Parkinson's disease dementia: a neural networks perspective. *Brain* 138, 1454–1476.
8. Schmidt, C.J., Chapin, D.S., Cianfrogna, J., Corman, M.L., Hajos, M., Harms, J.F., Hoffman, W.E., Lebel, L.A., McCarthy, S.A., Nelson, F.R., et al. (2008). Preclinical characterization of selective phosphodiesterase 10A inhibitors: a new therapeutic approach to the treatment of schizophrenia. *J. Pharmacol. Exp. Ther.* 325, 681–690.
9. Giampà, C., Laurenti, D., Anzilotti, S., Bernardi, G., Menniti, F.S., and Fusco, F.R. (2010). Inhibition of the striatal specific phosphodiesterase PDE10A ameliorates striatal and cortical pathology in R6/2 mouse model of Huntington's disease. *PLoS ONE* 5, e13417.
10. Wilson, L.S., and Brandon, N.J. (2015). Emerging biology of PDE10A. *Curr. Pharm. Des.* 21, 378–388.
11. Marques, T.R., Natesan, S., Niccolini, F., Politis, M., Gunn, R.N., Searle, G.E., Howes, O., Rabiner, E.A., and Kapur, S. (2016). Phosphodiesterase 10A in Schizophrenia: A PET Study Using [(11)C]IMA107. *Am. J. Psychiatry*, p201515040518.
12. Niccolini, F., Haider, S., Reis Marques, T., Muhlert, N., Tziortzi, A.C., Searle, G.E., Natesan, S., Piccini, P., Kapur, S., Rabiner, E.A., et al. (2015). Altered PDE10A expression detectable early before symptomatic onset in Huntington's disease. *Brain* 138, 3016–3029.
13. Carr, I.M., Flintoff, K.J., Taylor, G.R., Markham, A.F., and Bonthron, D.T. (2006). Interactive visual analysis of SNP data for rapid autozygosity mapping in consanguineous families. *Hum. Mutat.* 27, 1041–1046.
14. Carr, I.M., Sheridan, E., Hayward, B.E., Markham, A.F., and Bonthron, D.T. (2009). IBDfinder and SNPsetter: tools for pedigree-independent identification of autozygous regions in individuals with recessive inherited disease. *Hum. Mutat.* 30, 960–967.
15. DePristo, M.A., Banks, E., Poplin, R., Garimella, K.V., Maguire, J.R., Hartl, C., Philippakis, A.A., del Angel, G., Rivas, M.A., Hanna, M., et al. (2011). A framework for variation discovery and genotyping using next-generation DNA sequencing data. *Nat. Genet.* 43, 491–498.
16. McKenna, A., Hanna, M., Banks, E., Sivachenko, A., Cibulskis, K., Kernysky, A., Garimella, K., Altshuler, D., Gabriel, S., Daly, M., and DePristo, M.A. (2010). The Genome Analysis Toolkit: a MapReduce framework for analyzing next-generation DNA sequencing data. *Genome Res.* 20, 1297–1303.
17. Li, H., and Durbin, R. (2010). Fast and accurate long-read alignment with Burrows-Wheeler transform. *Bioinformatics* 26, 589–595.
18. Li, H., Handsaker, B., Wysoker, A., Fennell, T., Ruan, J., Homer, N., Marth, G., Abecasis, G., and Durbin, R.; 1000 Genome Project Data Processing Subgroup (2009). The Sequence Alignment/Map format and SAMtools. *Bioinformatics* 25, 2078–2079.
19. Wang, K., Li, M., and Hakonarson, H. (2010). ANNOVAR: functional annotation of genetic variants from high-throughput sequencing data. *Nucleic Acids Res.* 38, e164.
20. Muylers, J.P., Zhang, Y., Benes, V., Testa, G., Rientjes, J.M., and Stewart, A.F. (2004). ET recombination: DNA engineering using homologous recombination in *E. coli*. *Methods Mol. Biol.* 256, 107–121.
21. Roach, M.L., Stock, J.L., Byrum, R., Koller, B.H., and McNeish, J.D. (1995). A new embryonic stem cell line from DBA/1lacJ mice allows genetic modification in a murine model of human inflammation. *Exp. Cell Res.* 221, 520–525.
22. Longenecker, G., and Kulkarni, A.B. (2009). Generation of gene knockout mice by ES cell microinjection. *Curr. Protoc. Cell Biol.* Chapter 19, 14, 1–36.
23. Rogers, D.C., Peters, J., Martin, J.E., Ball, S., Nicholson, S.J., Witherden, A.S., Hafezparast, M., Latcham, J., Robinson, T.L., Quilter, C.A., and Fisher, E.M. (2001). SHIRPA, a protocol for behavioral assessment: validation for longitudinal study of neurological dysfunction in mice. *Neurosci. Lett.* 306, 89–92.
24. Seeger, T.F., Bartlett, B., Coskran, T.M., Culp, J.S., James, L.C., Krull, D.L., Lanfear, J., Ryan, A.M., Schmidt, C.J., Strick, C.A., et al. (2003). Immunohistochemical localization of PDE10A in the rat brain. *Brain Res.* 985, 113–126.
25. Charych, E.I., Jiang, L.X., Lo, F., Sullivan, K., and Brandon, N.J. (2010). Interplay of palmitoylation and phosphorylation in the trafficking and localization of phosphodiesterase



- 10A: implications for the treatment of schizophrenia. *J. Neurosci.* 30, 9027–9037.
26. Adzhubei, I.A., Schmidt, S., Peshkin, L., Ramensky, V.E., Gerasimova, A., Bork, P., Kondrashov, A.S., and Sunyaev, S.R. (2010). A method and server for predicting damaging missense mutations. *Nat. Methods* 7, 248–249.
  27. Threlfell, S., Sammut, S., Menniti, F.S., Schmidt, C.J., and West, A.R. (2009). Inhibition of Phosphodiesterase 10A Increases the Responsiveness of Striatal Projection Neurons to Cortical Stimulation. *J. Pharmacol. Exp. Ther.* 328, 785–795.
  28. Berardelli, A., Noth, J., Thompson, P.D., Bollen, E.L., Currà, A., Deuschl, G., van Dijk, J.G., Töpper, R., Schwarz, M., and Roos, R.A. (1999). Pathophysiology of chorea and bradykinesia in Huntington's disease. *Mov. Disord.* 14, 398–403.
  29. Pouladi, M.A., Morton, A.J., and Hayden, M.R. (2013). Choosing an animal model for the study of Huntington's disease. *Nat. Rev. Neurosci.* 14, 708–721.
  30. Hebb, A.L.O., Robertson, H.A., and Denovan-Wright, E.M. (2004). Striatal phosphodiesterase mRNA and protein levels are reduced in Huntington's disease transgenic mice prior to the onset of motor symptoms. *Neuroscience* 123, 967–981.
  31. Niccolini, F., Haider, S., Reis Marques, T., Muhlert, N., Tziortzi, A.C., Searle, G.E., Natesan, S., Piccini, P., Kapur, S., Rabiner, E.A., et al. (2015). Altered PDE10A expression detectable early before symptomatic onset in Huntington's disease. *Brain* 138, 3016–3029.
  32. Russell, D.S., Barret, O., Jennings, D.L., Friedman, J.H., Tamagnan, G.D., Thomae, D., Alagille, D., Morley, T.J., Papin, C., Papapetropoulos, S., et al. (2014). The phosphodiesterase 10 positron emission tomography tracer, [18F]MNI-659, as a novel biomarker for early Huntington disease. *JAMA Neurol.* 71, 1520–1528.
  33. Chen, D.H., Méneret, A., Friedman, J.R., Korvatska, O., Gad, A., Bonkowski, E.S., Stessman, H.A., Doummar, D., Mignot, C., Anheim, M., et al. (2015). ADCY5-related dyskinesia: Broader spectrum and genotype-phenotype correlations. *Neurology* 85, 2026–2035.
  34. Chen, Y.Z., Friedman, J.R., Chen, D.H., Chan, G.C., Bloss, C.S., Hisama, F.M., Topol, S.E., Carson, A.R., Pham, P.H., Bonkowski, E.S., et al. (2014). Gain-of-function ADCY5 mutations in familial dyskinesia with facial myokymia. *Ann. Neurol.* 75, 542–549.

## Supplemental Data

### **Biallelic Mutations in *PDE10A* Lead to Loss of Striatal PDE10A and a Hyperkinetic Movement Disorder with Onset in Infancy**

Christine P. Diggle, Stacey J. Sukoff Rizzo, Michael Popiolek, Reetta Hinttala, Jan-Philip Schülke, Manju A. Kurian, Ian M. Carr, Alexander F. Markham, David T. Bonthron, Christopher Watson, Saghira Malik Sharif, Veronica Reinhart, Larry C. James, Michelle A. Vanase-Frawley, Erik Charych, Melanie Allen, John Harms, Christopher J. Schmidt, Joanne Ng, Karen Pysden, Christine Strick, Päivi Vieira, Katariina Mankinen, Hannaleena Kokkonen, Matti Kallioinen, Raija Sormunen, Juha O. Rinne, Jarkko Johansson, Kati Alakurtti, Laura Huilaja, Tiina Hurskainen, Kaisa Tasanen, Eija Anttila, Tiago Reis Marques, Oliver Howes, Marius Politis, Somayyeh Fahiminiya, Khanh Q. Nguyen, Jacek Majewski, Johanna Uusimaa, Eamonn Sheridan, and Nicholas J. Brandon

## **Supplemental Note: Case Reports**

*Family 1* is a UK family of Pakistani origin.

IV:2 was the proband. He presented to the department of clinical genetics at age 5 with generalised developmental delay, motor delay had been evident since age 3 months. At age 5 he was noted to be ataxic with a wide based stamping gait and frequent falls. He was unable to manage tandem gait and had a marked intention tremor. On closer examination he had a generalised movement disorder with dyskinesia of all four limbs in all positions. There was also an orofacial dyskinesia. There was no obvious muscle weakness, there was no peripheral neuropathy or sensory deficit. He was markedly dysarthric, without dysphagia, and in fact had good general comprehension. There was no facial weakness and cranial nerve examination was otherwise normal. Tendon reflexes were brisk but plantars were downgoing.

A diagnosis of a generalised dyskinetic movement disorder was made, with little evidence of a cognitive impairment. He was investigated but there was no evidence of acanthocytes in blood. Urinary organic acid analysis was normal, in particular glutaric aciduria was excluded. Serum copper and ceruloplasmin levels were normal. Thyroid function tests and serum lipids were normal. Routine karyotype was also normal.

He was further reviewed throughout childhood and adult life. Last review was at age 38, on examination he had a subtle dyskinesia of the arms, hands and fingers which is made worse when he was asked to raise his hands above his head. On walking his gait was reasonable, but he had clear difficulty maintaining progressive gait on heel-toe testing. Accompanying this difficulty in walking he had subtle but obvious dyskinesia of the fingers. He had a clear orofacial dyskinesia and his speech is slightly dysarthric. Tendon reflexes were brisk but plantars were downgoing and there was no sensory component or neuropathy.

IV:4 was the sister of the proband and presented at age 3 to the Clinical genetics department. She was again felt to have generalised delay from age 3 months but like her brother her manifestations were principally of a motor disturbance. She had the generalised dyskinesic movements of face trunk and limbs seen in her brother. She was dysarthric, but there were no other cranial nerve abnormalities apparent on examination, there was no real evidence of muscle weakness, there was no evidence of a peripheral neuropathy or sensory loss. She also had brisk tendon reflexes and downgoing plantars. Cognition was normal. Investigations revealed no obvious cause for her deficit. Routine karyotype was normal. She was reassessed throughout childhood and adult life. At her most recent assessment at age 31 findings were stable with no evidence of progression or improvement.

Individuals III:4 and III:5, the parents of IV:2 and IV:4 were examined and neither had any evidence of motor abnormalities. In view of the family structure and the absence of

disease in the parents a diagnosis of an autosomal recessive benign chorea was made. At a later date analysis of *NKX2-1* was performed in IV:2 but no mutation was identified.

V:1 was the first daughter of IV:2 and his first cousin. She presented in a very similar fashion to her father with delay in motor development first noted at the age of 4 months. She then presented with repeated falls and unsteady gait at age 3. She was followed up throughout childhood and was most recently seen at age 16 years. She attended a normal school and at her most recent assessment aged 16 was managing well, planning to complete school examinations. The major issue for her in class had always been her dysarthria which was very debilitating. Despite this her symptoms have remained stable through childhood. On examination aged 16 she displayed a generalized hyperkinetic movement disorder characterized by dyskinesia of the limbs and trunk, with facial involvement, orolingual dyskinesia and drooling. The hyperkinesia has a jerky quality, with occasional short almost myoclonic jerks of the upper limbs. She kept her mouth open during part of the examination, possibly suggestive of jaw dystonia. Her gait was abnormal, with some gait instability, reduced arm swing and impaired foot clearance and a possible shuffling nature to her gait. On walking backwards, she showed some distal upper limb posturing. Heel-toe walking was relatively stable, with heel-toe strike but was associated with upper limb posturing. She found jumping difficult and postures her hands (R>L) when performing this task. There were no overt cerebellar features on examination but tasks such as hand-tapping and finger-nose testing seem to exacerbate the hyperkinesia. She had brisk tendon reflexes with downgoing plantars

She was dysarthric but cranial nerve examination was normal. Results of investigations including cranial MRI, anti thyroid antibodies, and array CGH were normal. DNA studies for SCA (types 1, 2, 3, and 6), HD, and DRPLA were normal. Urinary organic acid analysis was normal, in particular glutaric aciduria was excluded. Serum copper and ceruloplasmin levels were normal. Thyroid function tests and serum lipids were normal. Routine karyotype was also normal.

.

V:2 was the second child of IV:2. She presented at age 6 months with motor delay, unable to sit unsupported with marked truncal ataxia. She went on to develop a dyskinetic movement disorder accompanied by dysarthria. She was most recently reviewed at age 15. On examination she had a hyperkinetic disorder characterised by dyskinetic movements of all four limbs and trunk. She had orofacial dyskinesia with some lingual dyskinesia and drooling. She was dysarthric. She had an abnormal gait with a shuffling nature and poor arm swing and and floor clearance of her feet. She was unable to maintain a good heel-toe gait, and on this test she had upper limb posturing like her sister. She was unable to jump, hand posturing accompanied her attempts. She had brisk tendon reflexes with downgoing plantars. She had no overt cerebellar signs. Although she displayed a worse dysarthria than her sister, cranial nerve examination was normal. She attended the same mainstream school as her elder sister V:1

V:3 was the third child to the couple, the younger sister of V:1 and V:2. She presented with motor delay aged 3 months, with poor head control and orofacial movements noted

by her parents. She developed a dyskinetic movement disorder during childhood similar to that seen in her sisters and father. She was most recently reviewed at age 12 years. . She had a similar degree of dysarthria to her sisters and attended the same school. On examination she had the jerky hyperkinetic movement disorder seen in her older sisters with dyskinesia of all four limbs and trunk. She had orofacial dyskinesia and some drooling. Like her sisters she had an unstable gait and upper limb posturing on heel-toe walking. Again she had brisk tendon reflexes with downgoing plantars. Results of all investigations were normal, in particular brain MRI was normal. Careful review of the basal ganglia and cerebellum in particular revealed no abnormality.

She had a similar degree of dysarthria to her sisters and attended the same school.

V:4 was the first male child to the couple. At age 2 months his mother noted abnormal facial movements and very messy feeding when he was weaned. This pattern was very similar to that noted by her in his sister, V:3. He went on to develop a very similar hyperkinetic movement disorder with dyskinesia of all four limbs and trunk. His speech was clearly dysarthric and and at age 2 he was very difficult to understand. His comprehension of speech was age appropriate. He was unable to stand unsupported at that age and had jerky dyskinetic movements of his limbs, which were worse when he was trying to pull himself to stand. He still had truncal ataxia and dyskinetic movements of his face. He had marked orolingual dyskinesia and severe drooling. His clinical signs at that age were very similar to his siblings at similar ages.

In summary all five individuals had a very stable movement disorder, characterised by hyperkinetic dyskinesia and dysarthria, however there was little evidence of a cognitive component. All investigations, including testing for mutations in *NKX2-1*, the cause of benign hereditary chorea (BCH OMIM 118700) were normal.

*Family 2* is of Caucasian origin and has two affected sons who were born at 35-38 weeks (with birth weights of 3550 g and 3890 g) to healthy parents who are the first cousins. Both male individuals (Individuals 1 and 2) presented with profound axial hypotonia and athetotic movements at four months of age. Brain MRI, EEG, ENMG and muscle biopsy did not show any specific abnormal findings. Mitochondrial respiratory chain enzyme activities of skeletal muscle sample were normal, and there were no deletions in muscle mitochondrial DNA (mtDNA). Sequencing of the mtDNA and nuclear genes encoding mitochondrial twinkle helicase (*PEO1*) and polymerase gamma (*POLG1*) were negative. Furthermore, *XNP* and *HPRT* genes were analyzed to exclude ATR-X and Lesch-Nyhan syndromes, but no pathogenic mutations were found. Extensive metabolic investigations including dopamine metabolites and other neurotransmitters in cerebrospinal fluid were unyielding. Motor and speech development of both individuals has been markedly delayed, but there has been no loss of skills. Both individuals suffer from severe dysarthria and they started to express a few words at the age of seven years, but they mainly communicate with picture symbols and sign language. Their understanding of speech has been estimated to be close to normal. They learned to wheel their wheel chairs independently at 7 years of age as well. Individual 1 was also diagnosed with insulin-dependent autoimmune diabetes at 7 years of age. At the age of 9 years he is able take a



couple of steps with support (Supplementary Video 1 on Individual 1). The younger brother (Individual 2) presents with a more severe neurological phenotype including more severe movement disorder, he has not learnt to stand up, his cognitive development is more delayed compared to his brother (Supplementary Video 2 on Individual 2). Furthermore, due to difficulties in eating a gastrostomy tube was inserted at 2.5 years of age, and he was diagnosed with focal epilepsy at 3.5 years presenting with focal dyscognitive seizures (impairment of consciousness, interruption of ongoing activities, staring, and swallowing). During carbamazepine (CBZ) treatment he has been seizure free except for occasional seizures with similar seizure type related to too low dose of CBZ. EEG revealed arrhythmic delta activity without focal epileptiformic discharges. Both individuals present with axial hypotonia and ongoing movement disorder with generalized hyperkinesia and dyskinesia affecting all four limbs, trunk and face that is described in more details in the videos (Supplementary Videos 1 and 2).

## Individual IV:2 from family 1

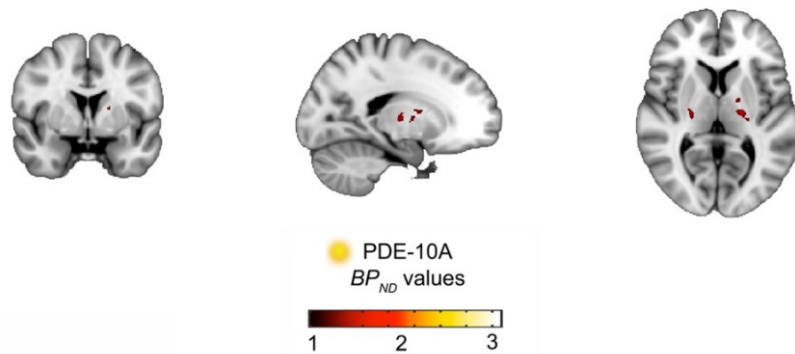

## Healthy Controls

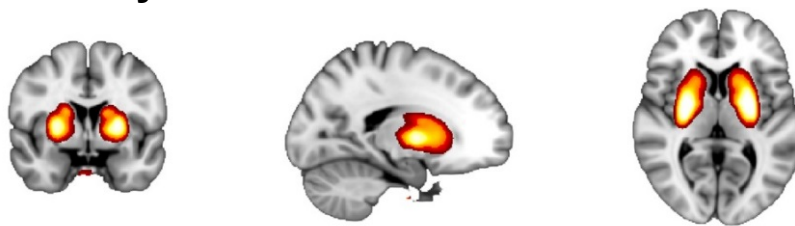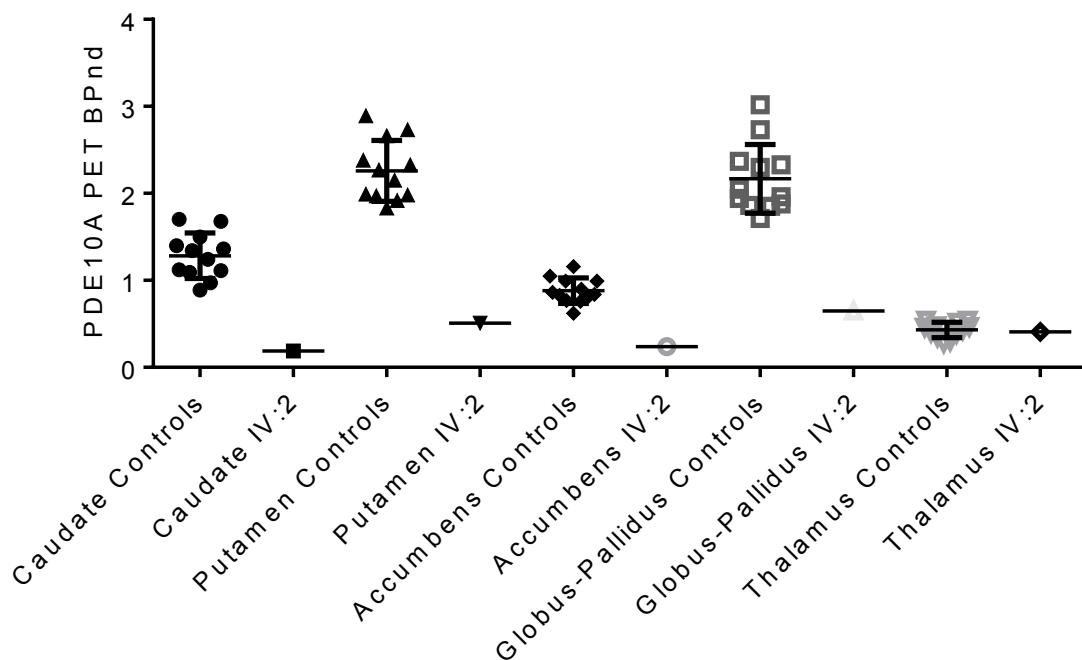

**Figure S1 PDE10A signal is reduced across different regions of the striatum in individual 1 (IV:2 Family 1)** Mean 11C-IMA107  $BP_{ND}$  parametric images derived from individual IV:2 Family 1 and 12 healthy controls in stereotaxic space overlaid onto the T1-weighted MNI template showing significant loss of striatal and pallidal PDE10A signal in IV:2. Scatterplots showing individual 11C- IMA107  $BP_{ND}$  values in the striatum and motor thalamic nuclei for healthy controls (Caudate controls et seq) , and individual IV:2 Family 1 (Caudate IV:2 et seq). Solid lines represent 11C-IMA107  $BP_{ND}$  mean and SD values for healthy controls and individual IV:2 Family 1.

## MRI of Individual IV:2 from family 1

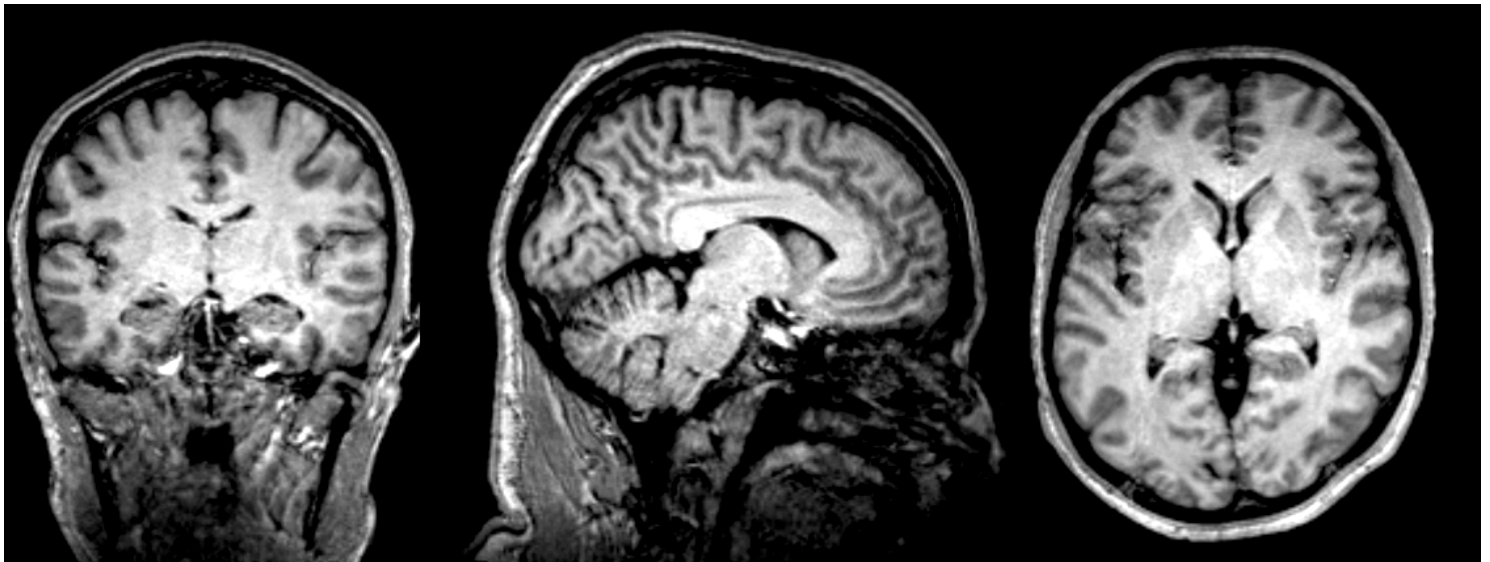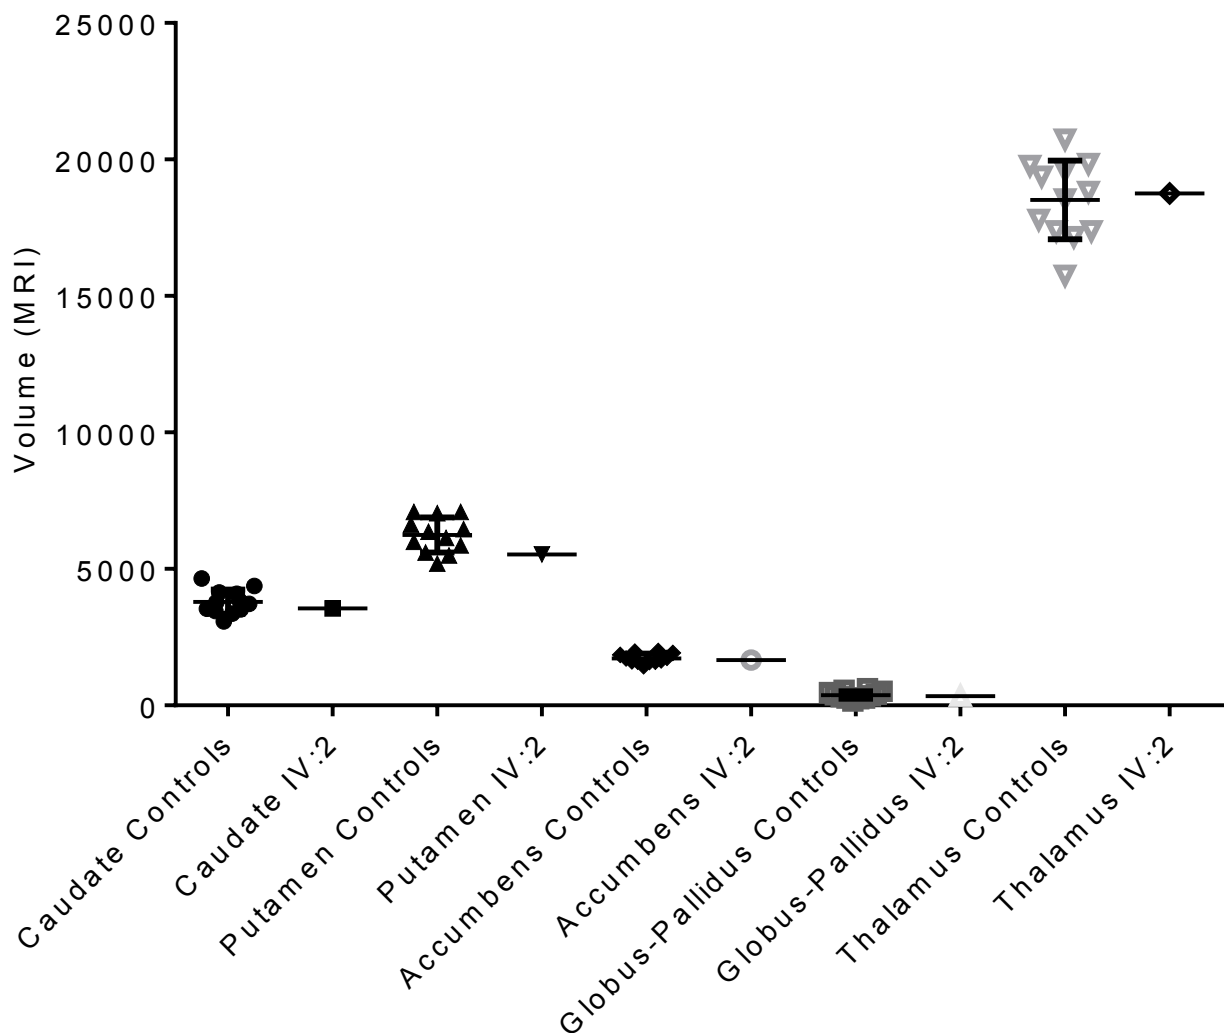

**Figure S2** Normal MRI from individual IV:2 from family 1. Scatterplots showing individual volume of caudate, putamen, nucleus accumbens, globus pallidus and thalamus for healthy controls (Caudate controls et seq) and individual IV: 2 Family 1 (Caudate IV:2 et seq). Solid lines represent mean and SD for healthy controls and individual IV:2 Family 1.

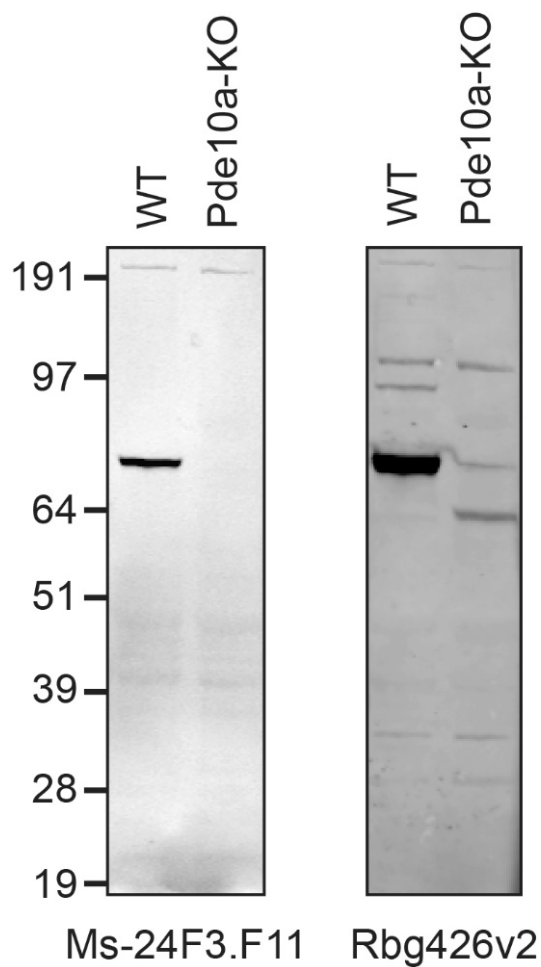

**Figure S3** Characterization of PDE10A antibodies.

Striatal lysates from either WT or Pde10a knock-out mice were analyzed for PDE10A expression with a specific PDE10A monoclonal antibody (mouse-anti- PDE10Ag24F3.F11) or a specific PDE10A polyclonal antibody (Rbg426v2).

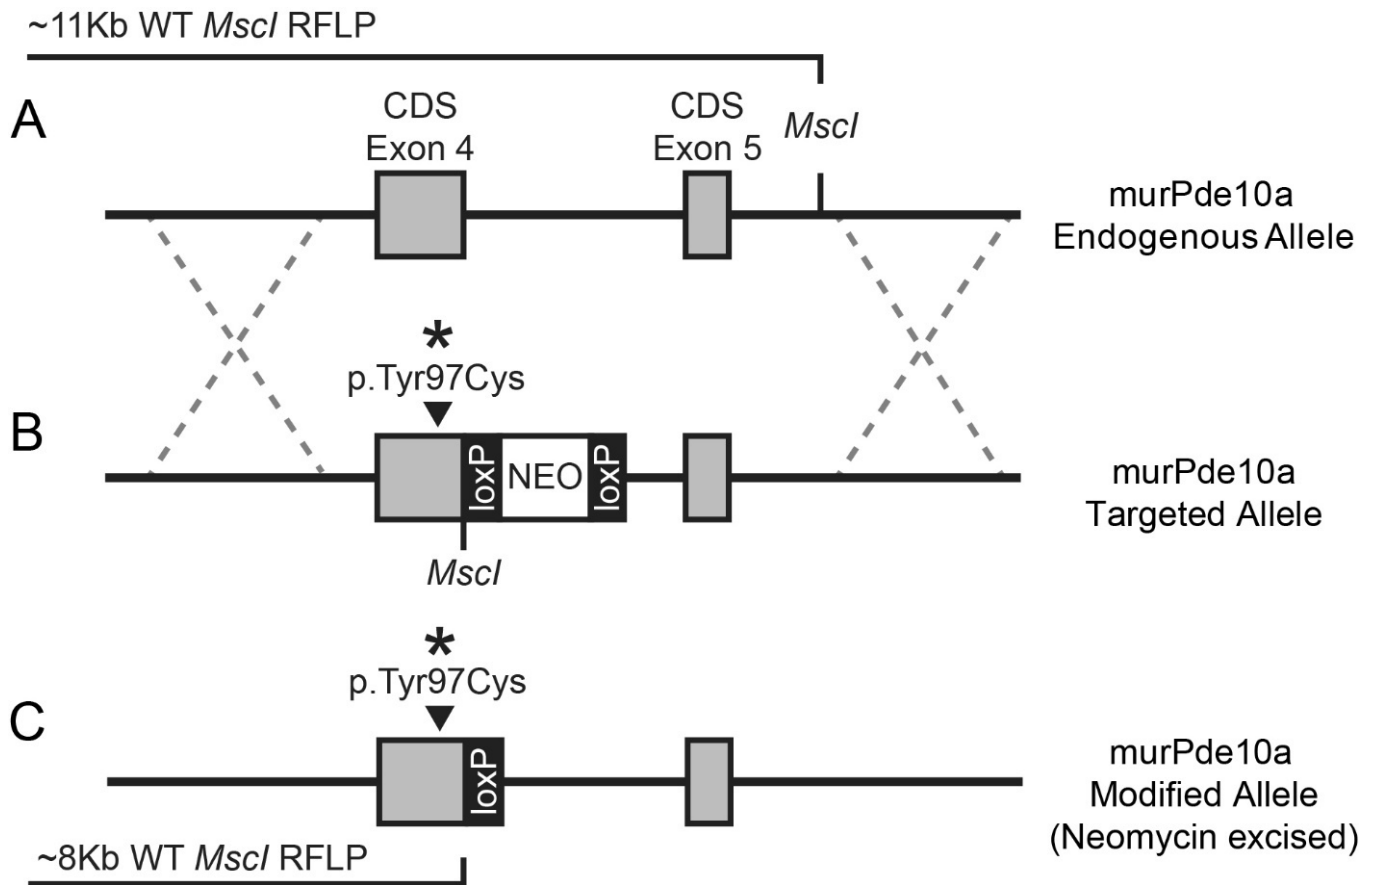

**Figure S4** Schematic of construct and genomic regions for Pde10A p.Tyr97Cys knock-in mouse. Please see Methods above for details on the targeting construct

## Young

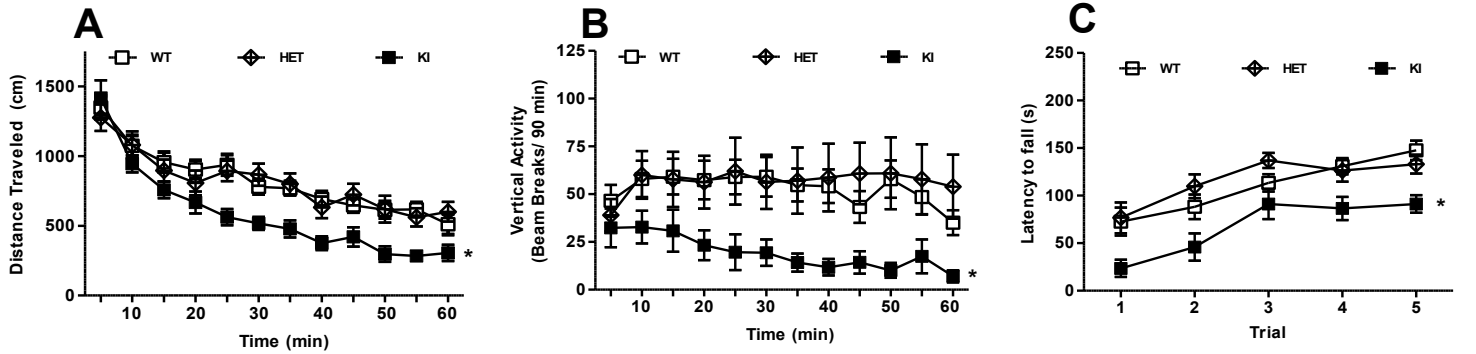

## Aged

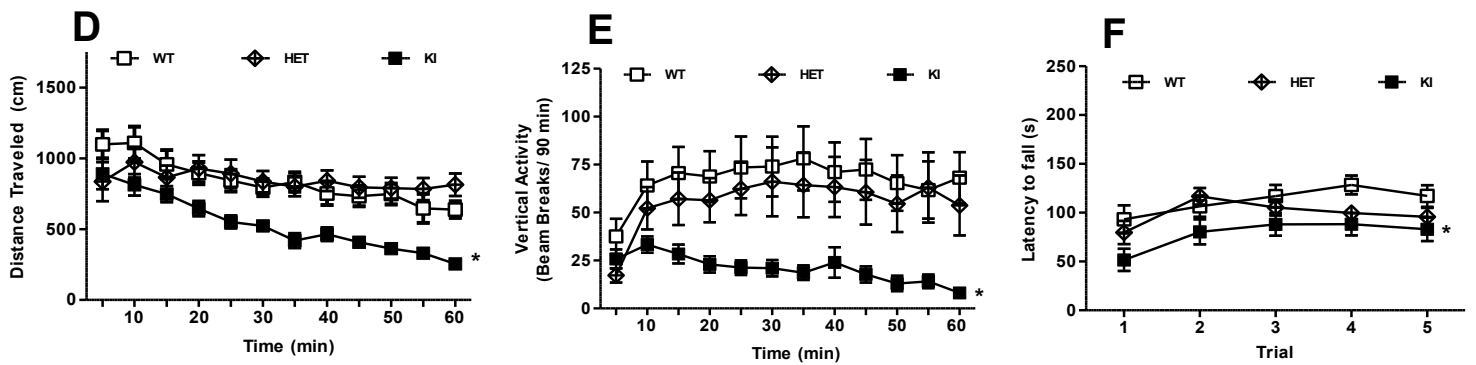

**Figure S5** Pde10A p.Tyr97Cys Knock-in mice demonstrate motor abnormalities. WT, HET and KI mice were evaluated at different ages (young; A-C and aged; D-F). Total distance traveled (A, D) and rearing behavior as measured by vertical activity (B, E) were analyzed by two-way repeated measures ANOVA (genotype x time), using Prism Statistical SoPware (version 5.0; GraphPad Software Inc, California USA), with Bonferroni post hoc tests as appropriate. Latency to fall (C, F) was recorded and analyzed by a two-way repeated measures ANOVA (genotype x trial) using Prism Statistical Software (version 5.0; GraphPad Software Inc, California USA) with Bonferroni post hoc tests as appropriate. All data are presented as group mean +/- s.e.m. WT (young, n=13; adult, n=7; aged, n=13), HET (young, n=12; aged, n=12), KI (young, n=11; aged, n=11) \* $p < 0.05$

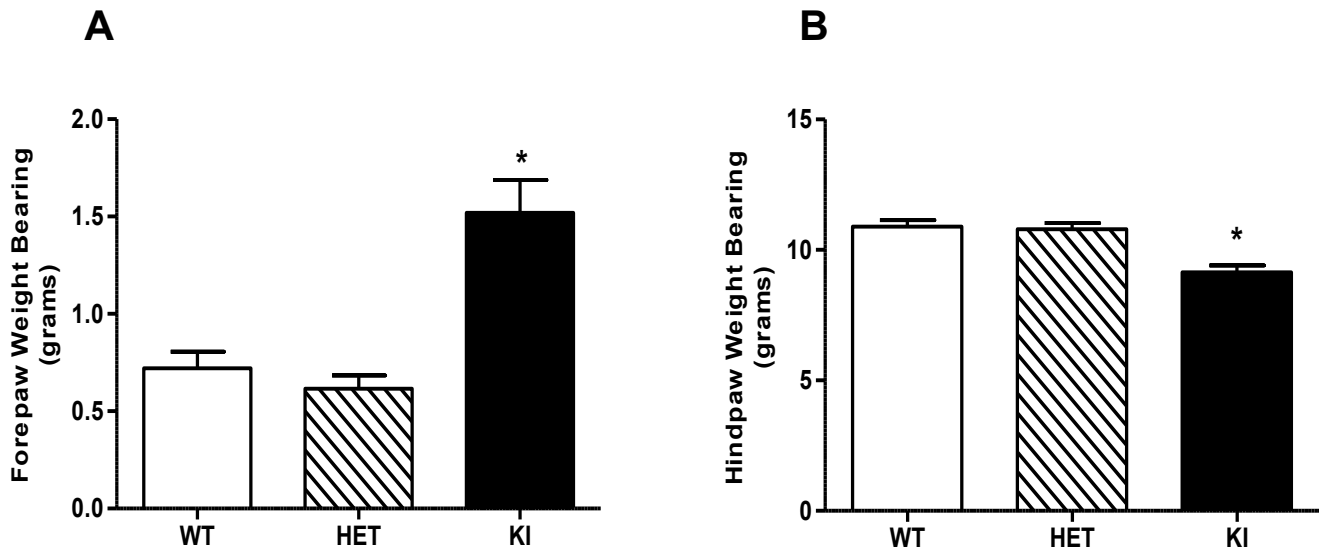

**Figure S6** Pde10A p.Tyr97Cys Knock-in mice show compensatory weight shifting from hindpaws to forepaws. Adult WT (n=12), HET (n=13) and KI (n=9) mice were evaluated in a dynamic weight bearing assay for differences in forepaw (A) and hindpaw (B) weight bearing. Data are presented as group mean  $\pm$  s.e.m. Individual measures were analyzed by one-way ANOVA with Dunnett's post hoc test as appropriate. \* $p < 0.05$

Table 1. Clinical Findings of 8 Affected Cases.

| Family | Case | Sex | Age at Onset | Current Age | Hyperkinetic movements (dyskinesia, myoclonus, chorea) | Dystonia | Dysarthria | Axial Hypotonia | Developmental Delay | Epilepsy | Brain MRI results |
|--------|------|-----|--------------|-------------|--------------------------------------------------------|----------|------------|-----------------|---------------------|----------|-------------------|
| 1      | IV:2 | M   | 3 mo         | 38yrs       | +                                                      | +        | +          | -               | -                   | -        | Normal            |
|        | IV:4 | F   | 3 mo         | 30 yrs      | +                                                      | +        | +          | -               | -                   | -        | ND                |
|        | V:1  | F   | 4 mo         | 17 yrs      | ++                                                     | ++       | ++         | +               | -                   | -        | Normal            |
|        | V:2  | F   | 6 mo         | 16 yrs      | +++                                                    | +        | ++         | +               | -                   | -        | ND                |
| 2      | V:3  | F   | 3mo          | 13 yrs      | ++                                                     | ++       | +++        | +               | -                   | -        | Normal            |
|        | V:4  | M   | 2 mo         | 2 yrs       | +++                                                    | +++      | +++        | ++              | -                   | -        | Normal            |
|        | IV:1 | M   | 4 mo         | 10 yrs      | +++                                                    | +++      | +++        | ++              | ++                  | +        | Normal            |
|        | IV:2 | M   | 4 mo         | 9 yrs       | +++                                                    | +++      | +++        | ++              | ++                  | -        | Normal            |

ND = Not done
